# Supplementary material for: Bioactivity of Essential Oils for Mitigation of Listeria monocytogenes Isolated from Fresh Retail Chicken Meat
Source: MDPI journal article supplement (doi:10.3390/foods10123006), 2021-12-04
Supplement: s1 [file s1]

# Bioactivity of Essential Oils for Mitigation of *Listeria monocytogenes* Isolated from Fresh Retail Chicken Meat

Alaa Eldin M. A. Morshdy <sup>1</sup>, Mohammed S. Al-Mogbel <sup>2</sup>, Mohamed E. M. Mohamed <sup>3</sup>,  
Mohamed Tharwat Elabbasy <sup>1,4</sup>, Azza K. Elshafee <sup>1,\*</sup> and Mohamed A. Hussein <sup>1</sup>

<sup>1</sup> Food Control Department, Faculty of Veterinary Medicine, Zagazig University, Zagazig 44519, Egypt; A.Morshedy@zu.edu.eg (A.E.M.A.M.); mt.elabbasy@uoh.edu.sa (M.T.E.); elged2010@yahoo.com (M.A.H.)

<sup>2</sup> Clinical Laboratory Sciences Department, College of Applied Medical Sciences, Ha'il University, Ha'il P.O. Box 2240, Saudi Arabia; msm\_hhscb@hotmail.com

<sup>3</sup> Zoonoses Department, Faculty of Veterinary Medicine, Zagazig University, 44519, Egypt; bishet68@yahoo.de

<sup>4</sup> Public Health Department, College of Public Health and Health Informatics, Ha'il University, Ha'il 2440, Saudi Arabia

\* Correspondence: aza.khaled@vet.zu.edu.eg; Tel.: [+2-01147560577](tel:+2-01147560577)

**Keywords:** *Listeria monocytogenes*, Antimicrobial agents, Essential oils, Multidrug-resistance, foodborne disease, Biofilm.

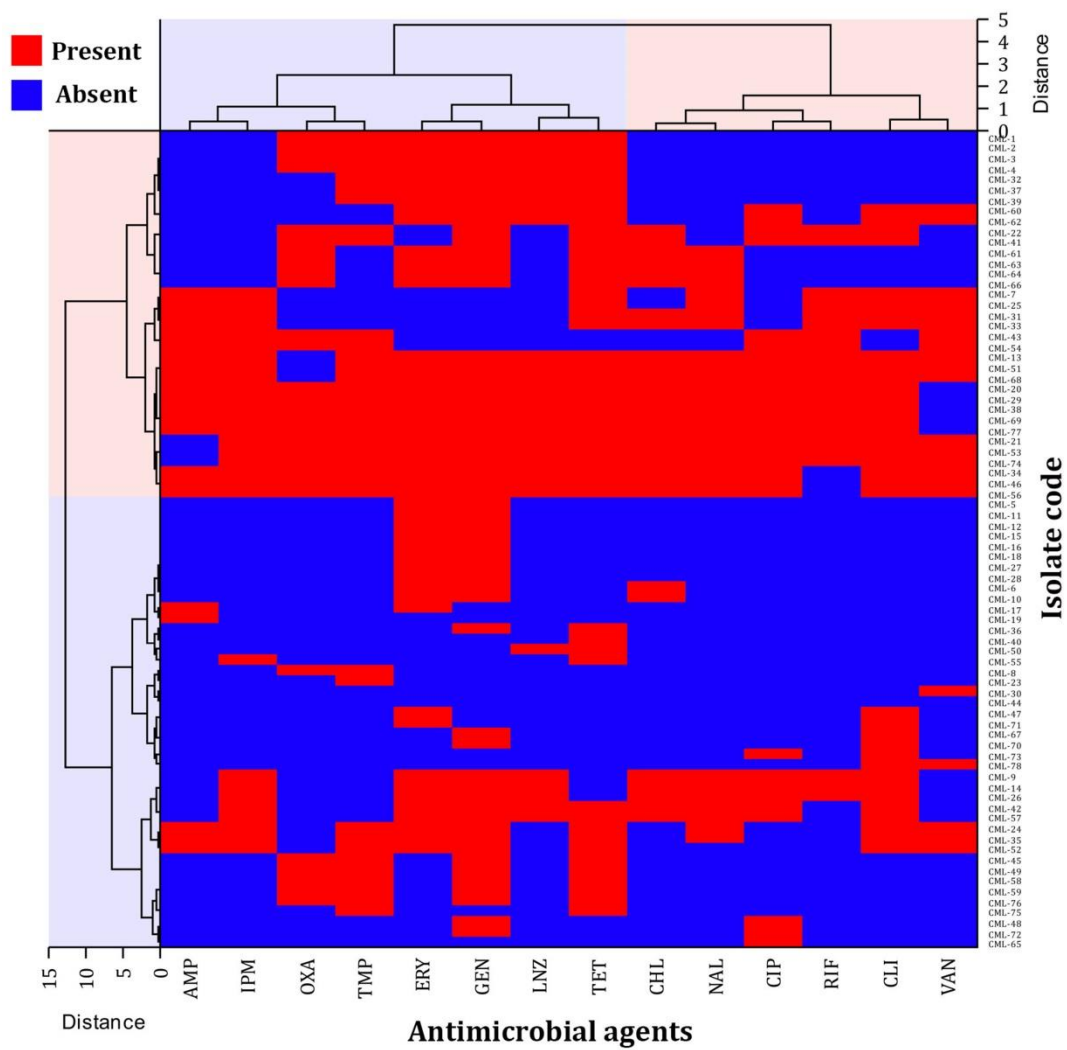

**Figure S1.** Clustering analysis for selecting the MDR *L. monocytogenes* strains.

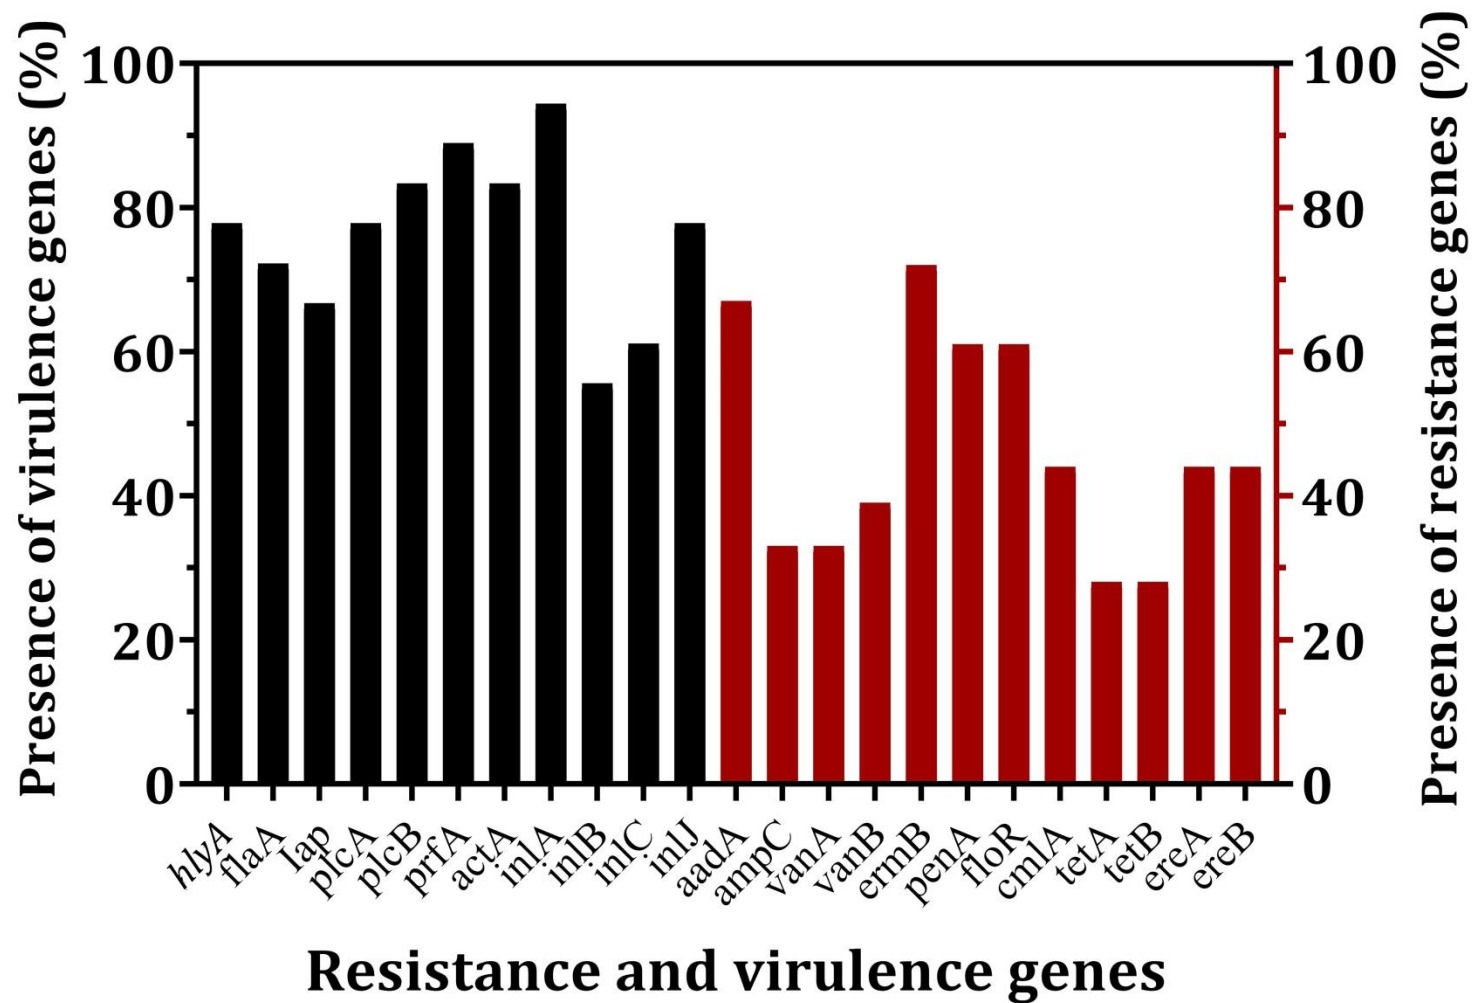

**Figure S2.** Incidence of resistance and virulence gene in MDR *L. monocytogenes* strains.

**Table S1.** Antimicrobial agents, zone and interpretive chart.

| Class                            | Antibiotics     | Abbreviation | Concentration<br>(µg/disc) | Interpretive categories and zone diameter<br>breakpoints (mm) |       |      |
|----------------------------------|-----------------|--------------|----------------------------|---------------------------------------------------------------|-------|------|
|                                  |                 |              |                            | S                                                             | I     | R    |
| <b>Penicillins</b>               | Ampicillin      | AMP          | 10                         | ≥17                                                           | 14-16 | ≤13  |
| <b>Phenicols</b>                 | Chloramphenicol | CHL          | 30                         | ≥ 18                                                          | 13-17 | ≤ 12 |
| <b>Fluoroquinolone</b>           | Ciprofloxacin   | CIP          | 5                          | ≥21                                                           | 16-20 | ≤15  |
| <b>Lincosamides</b>              | Clindamycin     | CLI          | 2                          | ≥ 21                                                          | 15-20 | ≤ 14 |
| <b>Macrolides</b>                | Erythromycin    | ERY          | 15                         | ≥ 23                                                          | 14-22 | ≤ 13 |
| <b>Aminoglycosides</b>           | Gentamicin      | GEN          | 120                        | ≥ 15                                                          | 13-14 | ≤ 12 |
| <b>Carbapenems</b>               | Imipenem        | IPM          | 10                         | ≥ 19                                                          | 16-18 | ≤ 15 |
| <b>oxazolidinones</b>            | Linezolid       | LNZ          | 30                         | ≥ 21                                                          | -     | ≤ 20 |
| <b>Quinolone</b>                 | Nalidixic acid  | NAL          | 30                         | ≥19                                                           | 14-18 | ≤13  |
| <b>B-lactam</b>                  | Oxacillin       | OXA          | 1                          | ≥18                                                           | -     | ≤17  |
| <b>Ansamycins</b>                | Rifampicin      | RIF          | 5                          | ≥ 20                                                          | 17-19 | ≤ 16 |
| <b>Tetracyclines</b>             | Tetracycline    | TET          | 30                         | ≥ 19                                                          | 15-18 | ≤ 14 |
| <b>Folate pathway inhibitors</b> | Trimethoprim    | TMP          | 5                          | ≥16                                                           | 11-15 | ≤10  |
| <b>Iclaprim</b>                  |                 |              |                            |                                                               |       |      |
| <b>Glycopeptides</b>             | Vancomycin      | VAN          | 30                         | ≥17                                                           | 15-16 | ≤14  |

**Table S2.** PCR Primers and references for 16S rRNA of *L. monocytogenes* and virulence genes.

| Target gene                    | Sequence (5'-3')                                                            | Amplified product (bp) | Reference |
|--------------------------------|-----------------------------------------------------------------------------|------------------------|-----------|
| 16S rRNA                       | F: GGACCGGGGCTAATACCGAATGATAA<br>R: TTCATGTAGGCGAGTTGCAGCCTA                | <b>1200</b>            | 28        |
| Listeriolysin O                | <i>HlyA</i><br>F: CCT AAG ACG CCA ATC GAA<br>R: AAG CGC TTG CAA CTG CTC     | <b>702</b>             | 29        |
| Flagellin protein              | <i>flaA</i><br>F: AGCTCTTAGCTCCATGAGTT<br>R: AGTAGCAGCACCTGTAGCAGT          | <b>420</b>             | 30        |
| Adhesion protein               | <i>Iap</i><br>F: ACAAGCTGCACCTGTTGCAG<br>R: TGACAGCGTGTGTAGTAGCA            | <b>131</b>             | 31        |
| LIPI-1<br>pathogenicity island | <i>plcA</i><br>F: CTGCTTGAGCGTTCATGTCTCATCCCCC<br>R: ATGGGTTTCACTCTCCTTCTAC | <b>1484</b>            | 32        |
|                                | <i>plcB</i><br>F: GCAAGTGTTCTAGTCTTTCCGG<br>R: ACCTGCCAAAGTTTGCTGTGA        | <b>795</b>             | 33        |
|                                | <i>prfA</i><br>F: CCCCAAGTAGCAGGACATGCTAA<br>R: GTATCACAAAGCTCACGAG         | <b>571</b>             |           |
|                                | <i>actA</i><br>F: CGCCGCGGAAATTAAAAAAGA<br>R: ACGAAGGAACCGGGCTGCTAG         | <b>839</b>             | 34        |
| Internalin proteins            | <i>inlA</i><br>F: ATTATGCCAAGTGTTACGGA<br>R: ATCTGTTTGCGAGACCGTGTC          | <b>800</b>             | 35        |
|                                | <i>inlB</i><br>F: CATGGGAGAGTAACCCAACC<br>R: GCGGTAACCCCTTTGTCATA           | <b>500</b>             | 35        |
|                                | <i>inlC</i><br>F: CCCACAATCAAATAAGTGACCTT<br>R: CTGGGTCTTTGACAGTATTTGTT     | <b>400</b>             |           |
|                                | <i>inlJ</i><br>F: TGTAACCCCGCTTACACAGTT<br>R: AGCGGCTTGGCAGTCTAATA          | <b>238</b>             | 35        |

**Table S3.** PCR Primers and references for 16S rRNA of *Listeria* and virulence genes.

| Target gene | Sequence (5'-3')                                        | Amplified product (bp) | Reference |
|-------------|---------------------------------------------------------|------------------------|-----------|
| <i>aadA</i> | F: GTGGATGGCGGCCTGAAGCC<br>R: AATGCCCAGTCGGCAGCG        | 525                    | 37        |
| <i>ampC</i> | F: TTCTATCAAMACTGGCARCC<br>R: CCYTTTTATGTACCCAYGA       | 550                    |           |
| <i>vanA</i> | F: CATGACGTATCGGTAAAATC<br>R: ACCGGGCAGRGTTATTGAC       | 885                    |           |
| <i>vanB</i> | F: CATGATGTGTCGGTAAAATC<br>R: ACCGGGCAGRGTTATTGAC       | 882                    |           |
| <i>ermB</i> | F: GAAAAGGTACTCAACCAAATA<br>R: AGTAACGGTACTTAAATTGTTTAC | 639                    | 38        |
| <i>penA</i> | F: ATCGAACAGGCGACGATGTC<br>R: GATTAAGACGGTGTTTTACGG     | 500                    | 39        |
| <i>floR</i> | F: TATCTCCCTGTCGTTTCCAG<br>R: AGAACTCGCCGATCAATG        | 399                    | 40        |
| <i>cmlA</i> | F: CCGCCACGGTGTTGTTGTTATC<br>R: CACCTTGCCTGCCCATCATTAG  | 698                    | 41        |
| <i>tetA</i> | F: GGCCTCAATTTCCTGACG<br>R: AAGCAGGATGTAGCCTGTGC        | 372                    | 42        |
| <i>tetB</i> | F: GAGACGCAATCGAATTCGG<br>R: TTTAGTGGCTATTCTTCCTGCC     | 228                    |           |
| <i>ereA</i> | F: AACACCCTGAACCCAAGGGACG<br>R: CTTACATCCGGATTCGCTCGA   | 420                    | 43        |
| <i>ereB</i> | F: AGAAATGGAGGTTCACTTACCA<br>R: CATATAATCATCACCAATGGCA  | 546                    |           |
